# Supplementary material
Source: HighWire-hosted journal article supplement (http://www.qdcxjkg.com/highwire/filestream/126495/field_highwire_adjunct_files/9/ERJ-00937-2015_Table_S1.pdf)
Supplement: ERJ-00937-2015_Table_S1.pdf [file ERJ-00937-2015_Table_S1.pdf]

Supplementary Table S1: Correlation of histomorphological characteristics

|                                                  | Budding<br>(per HPF) | Budding<br>(per 10 HPF) | Smallest tumor<br>cell nest<br>(overall) | Smallest tumor<br>cell nest<br>(invasive margin) | Nuclear<br>size     | Stromal<br>content  | Ki-67               |
|--------------------------------------------------|----------------------|-------------------------|------------------------------------------|--------------------------------------------------|---------------------|---------------------|---------------------|
| Budding<br>(per HPF)                             | x                    | r=0.980<br>p<0.001      | r=-0.593<br>p<0.001                      | r=-0.841<br>p<0.001                              | r=0.203<br>p<0.001  | r=0.304<br>p<0.001  | r=-0.11<br>p=0.799  |
| Budding<br>(per 10 HPF)                          |                      | x                       | r=-0.598<br>p<0.001                      | r=-0.844<br>p<0.001                              | r=0.203<br>p<0.001  | r=0.312<br>p<0.001  | r=-0.22<br>p=0.624  |
| Smallest tumor<br>cell nest<br>(overall)         |                      |                         | x                                        | r=0.736<br>p<0.001                               | r=-0.224<br>p<0.001 | r=-0.394<br>p<0.001 | r=0.025<br>p=0.570  |
| Smallest tumor<br>cell nest<br>(invasive margin) |                      |                         |                                          | x                                                | r=-0.249<br>p<0.001 | r=-0.394<br>p<0.001 | r=-0.054<br>p=0.217 |
| Nuclear<br>size                                  |                      |                         |                                          |                                                  | x                   | r=0.113<br>p=0.013  | r=-0.006<br>p=0.899 |
| Stromal<br>content                               |                      |                         |                                          |                                                  |                     | x                   | r=-0.117<br>p=0.012 |
